# Supplementary material for: Bio-based arginine surface-modified ammonium polyphosphate: an efficient intumescent flame retardant for epoxy resin
Source: Royal Society of Chemistry journal article supplement (doi:10.1039/d1ra09459a), 2022-01-01
Supplement: d1ra09459a1.pdf [file d1ra09459a1.pdf]

## Supplementary information for

### Bio-based arginine surface-modified ammonium polyphosphate: an efficient intumescent flame retardant for epoxy resin

Chen Cheng,<sup>a</sup> Yi Wang,<sup>b</sup> Yanling Lu,<sup>a</sup> Shaojie Li,<sup>a</sup> Hua Li,<sup>a</sup> Jun Yan,<sup>\*c</sup> and Shiguo Du<sup>\*a</sup>

<sup>a</sup> Army Engineering University of PLA-Shijiazhuang Campus, Shijiazhuang, China

<sup>b</sup> Naval Aeronautical University, Yantai, Shandong, P. R. China

<sup>c</sup> Hebei Jiaotong Vocation and Technical College, Shijiazhuang, China

Corresponding author: Jun Yan, Email: yan-junjun@263.net; Shiguo Du, Email: shiguoduaeu@163.com

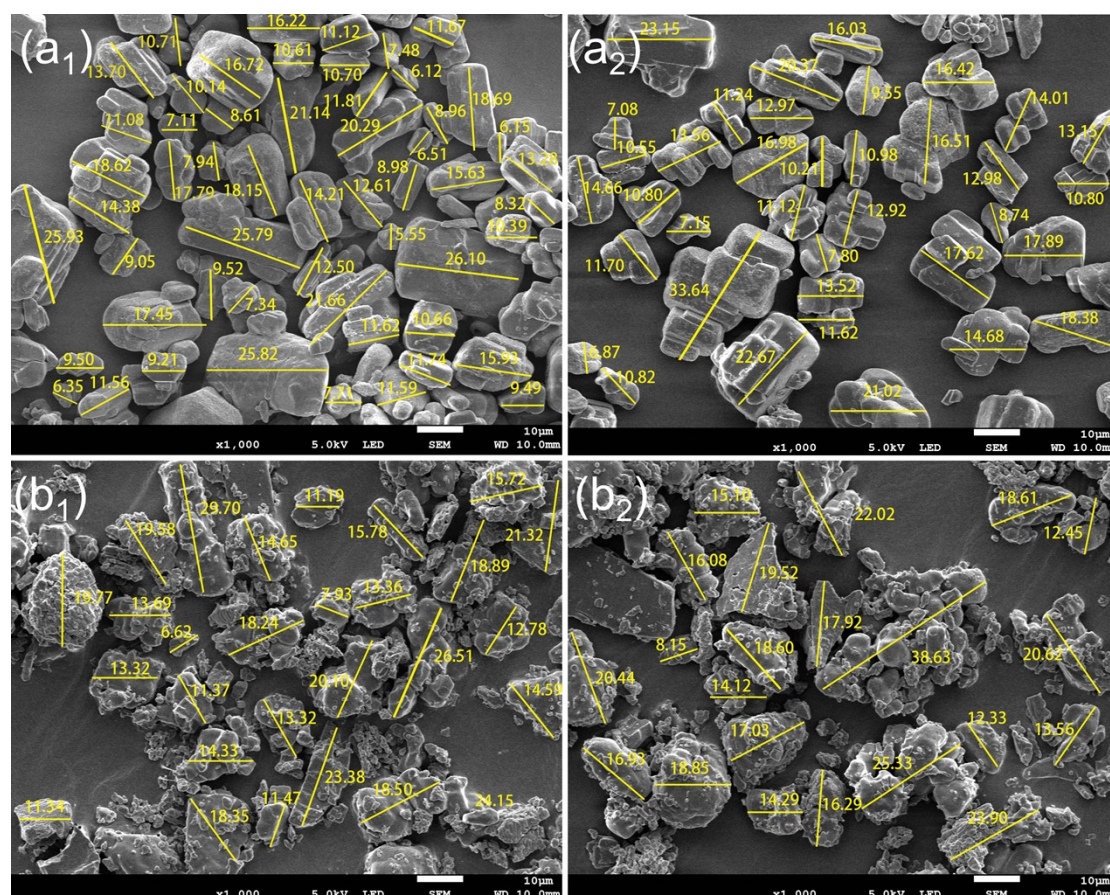

Figure S1. The SEM micrographs of (a<sub>1</sub>)-(a<sub>2</sub>) APP and (b<sub>1</sub>)-(b<sub>2</sub>) Arg-APP

Table S1. The particle sizes of APP and Arg-APP

| Sample  | Particle size ( $\mu\text{m}$ ) |
|---------|---------------------------------|
| APP     | 13.46 $\pm$ 5.49                |
| Arg-APP | 17.21 $\pm$ 5.66                |

Table S2. Characteristic XPS results on the C<sub>1s</sub> spectra of the residues

| Sample       | C-C/C-H (%) | C=C (%) | C-O/C-N (%) | C=O (%) |
|--------------|-------------|---------|-------------|---------|
| EP           | 61.0        | 7.3     | 15.8        | 15.8    |
| EP/APP15     | 63.7        | 16.8    | 11.8        | 7.7     |
| EP/Arg-APP25 | 81.5        | 9.0     | 9.5         | -       |
